# Supplementary material
Source: PubMed Central journal article supplement (PMC10556196)

A. All

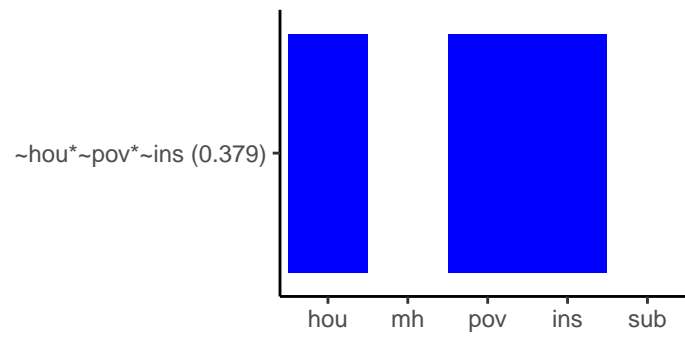

B. Asian or Other Cis Gay M

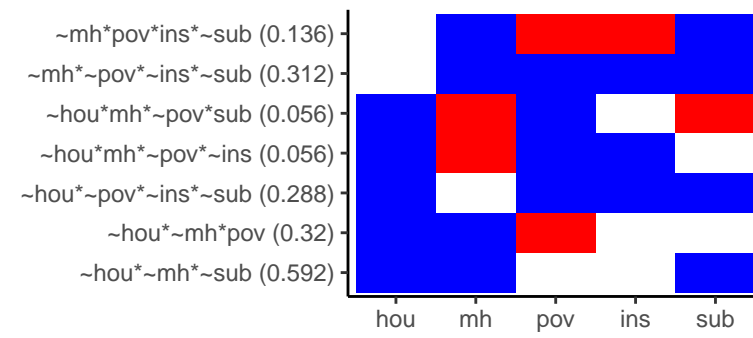

C. Black Bi Cis Man

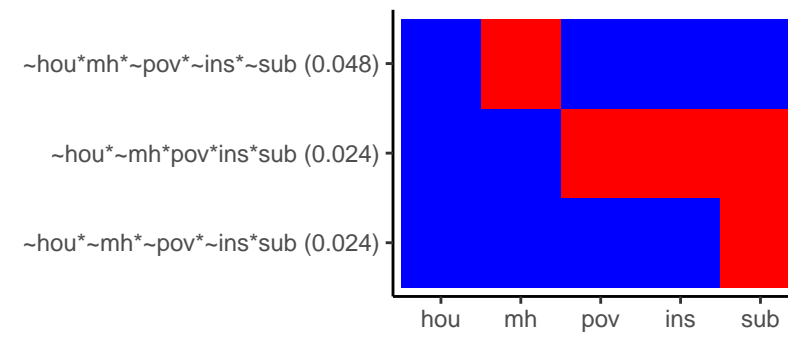

D. Black Gay Cis Man

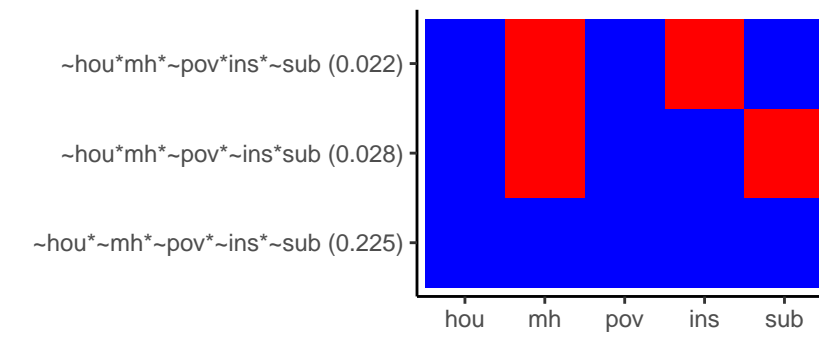

E. Black Het Cis Man

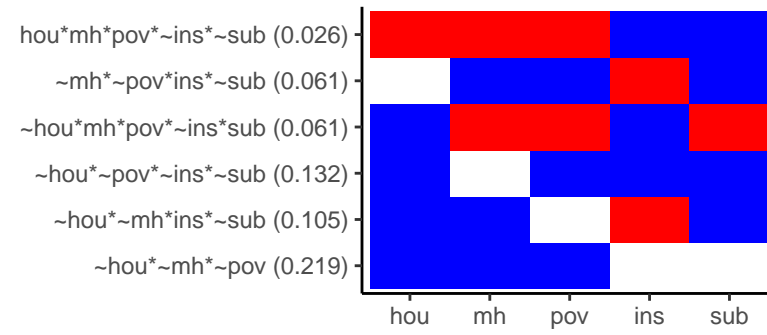

F. Black Het Cis Woman

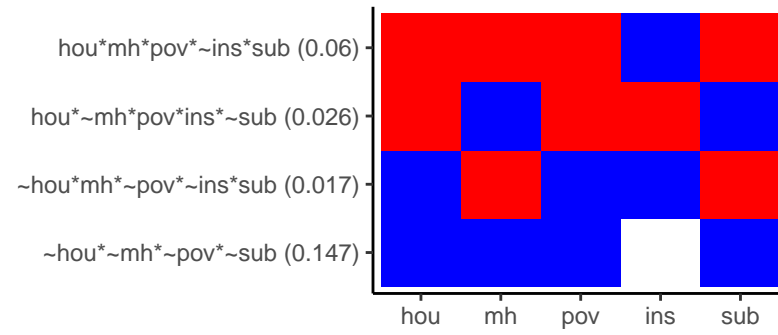

G. Black Queer Cis Man

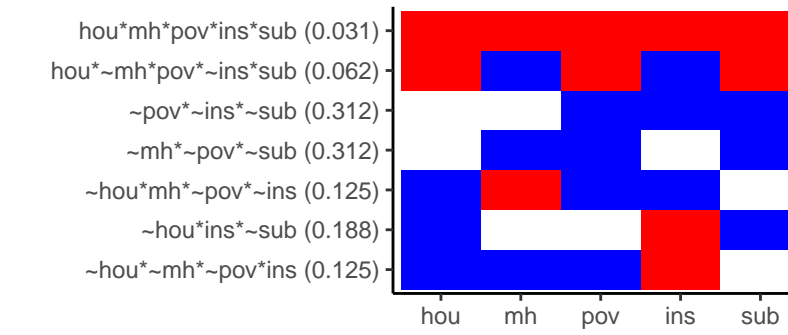

H. Black Trans Woman

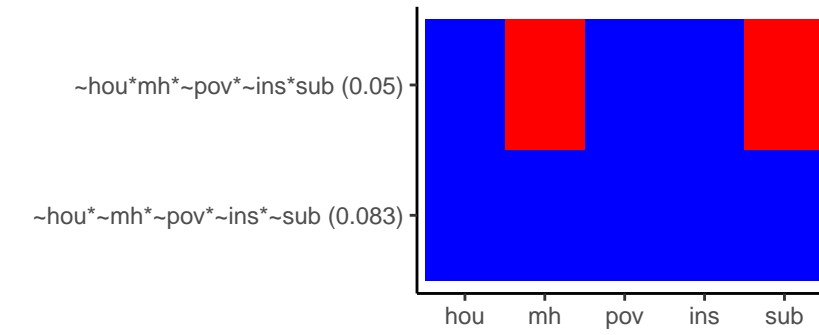

I. Hispanic Gay Cis Man

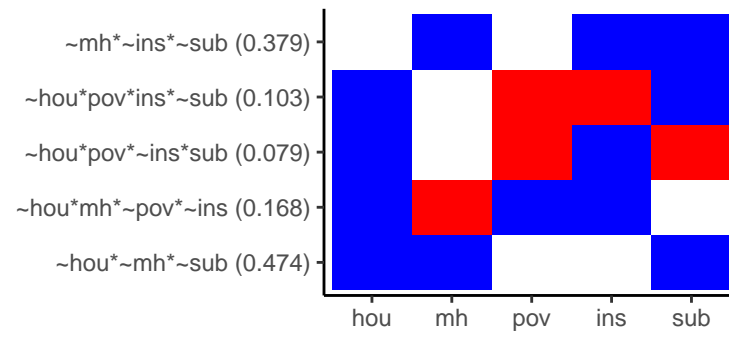

J. Hispanic Het Cis Man

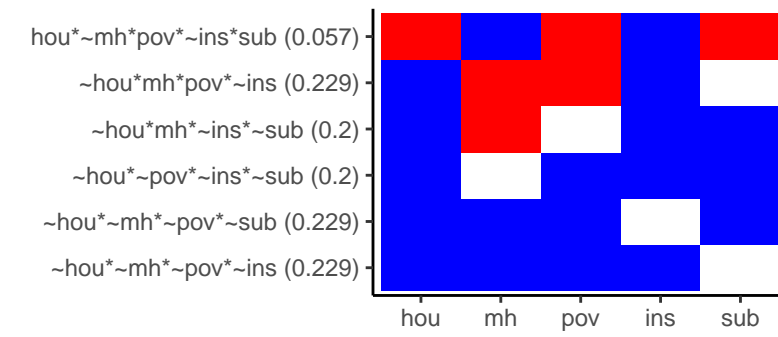

K. Hispanic Trans Woman

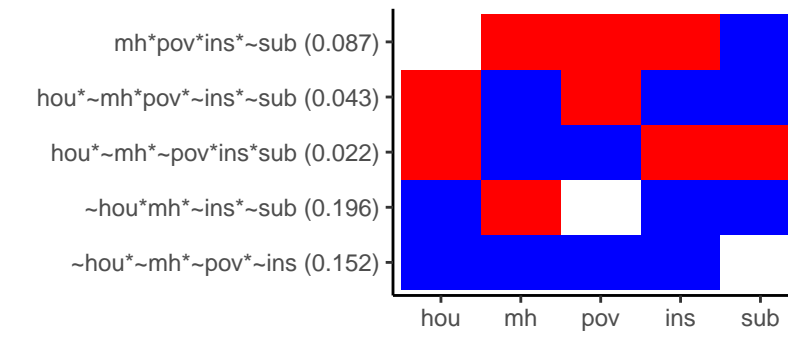

L. non-Black Cis Woman

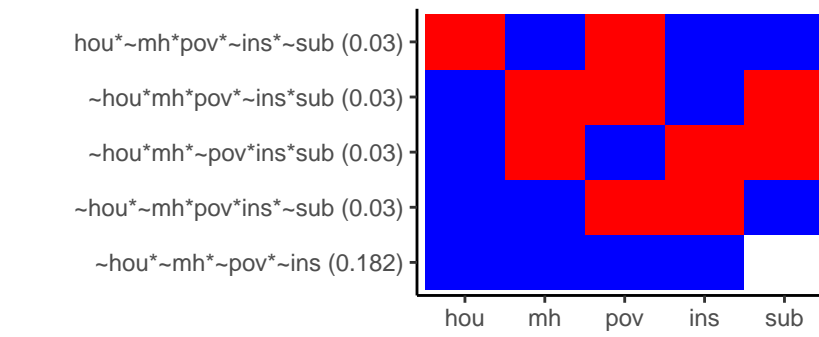

M. White Bi Cis Man

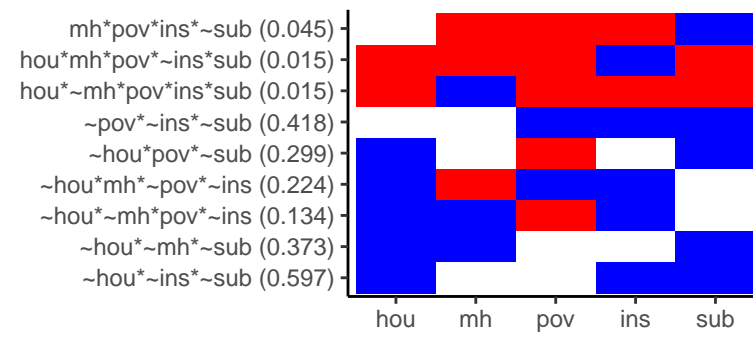

N. White Gay Cis Man

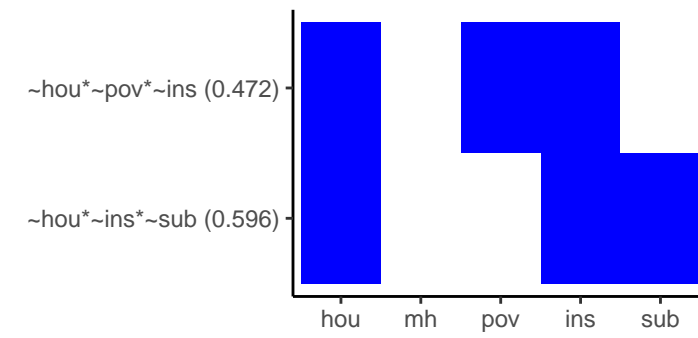

O. White Het Cis Man

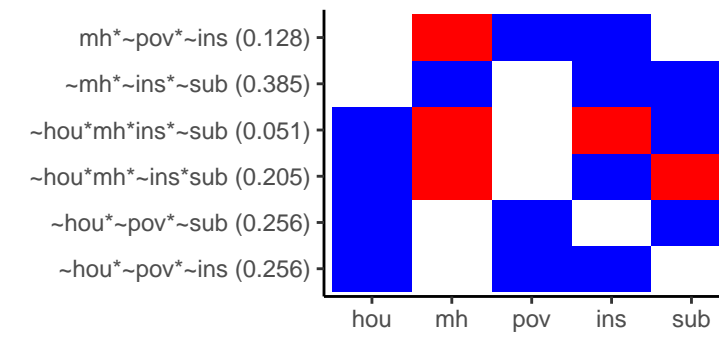

P. White Queer Cis Man

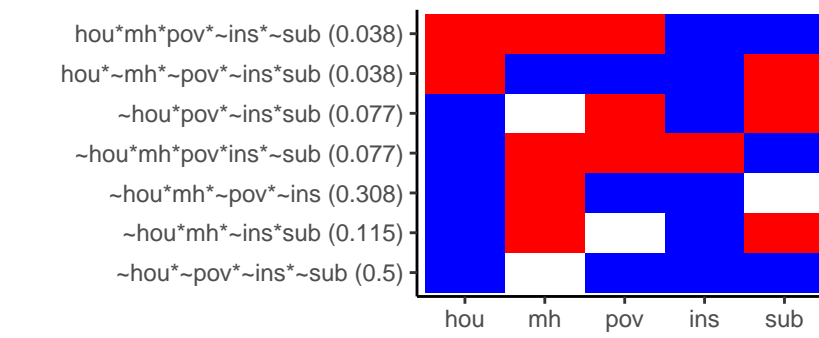

Supplement: NIHMS1888434-supplement-Supplemental_Digital_Content_3.pdf [file NIHMS1888434-supplement-Supplemental_Digital_Content_3.pdf]
